# Supplementary material for: Effects of thermal processing on digestion stability and immunoreactivity of the Litopenaeus vannamei matrix
Source: Royal Society of Chemistry journal article supplement (doi:10.1039/c9fo00971j), 2019-01-01

## **Supplementary information**

### **Figure legends**

#### **Figure S1. Quantification of heat stable allergens in Western blotting by ImageJ.**

A. Quantification in simulated gastric digestion.

B. Quantification in simulated duodenum digestion after gastric digestion.

Control, the sample after cooking and before digestion.

**Table S1. Specific IgE levels in patients in relation to the shrimp.**

| ID    | Age | Sex <sup>a</sup> | Symptom               | Specific IgE (kU /L) |
|-------|-----|------------------|-----------------------|----------------------|
| 05172 | 27  | F                | eczema                | 0.6                  |
| 05211 | 18  | F                | urticaria             | ≥100.0               |
| 05212 | 37  | F                | - <sup>b</sup>        | ≥100.0               |
| 05267 | 27  | F                | anaphylactic rhinitis | ≥100.0               |
| 05281 | 31  | F                | - <sup>b</sup>        | ≥100.0               |
| 05303 | 34  | F                | - <sup>b</sup>        | ≥100.0               |
| 05679 | 21  | M                | pruritus and nuasea   | 97.3                 |
| 05183 | 23  | F                | dermatitis            | 78.6                 |
| 68417 | 20  | F                | anaphylactic rhinitis | 32.1                 |
| 11974 | 26  | F                | asthma and dyspnea    | 82.5                 |
| 92907 | 27  | F                | asthma                | 79.8                 |
| 34258 | 27  | M                | - <sup>c</sup>        | 0.2                  |

**Note:** <sup>a</sup>- M, male; F, female. <sup>b</sup>- means symptoms not obvious. <sup>c</sup>- means food allergy-free.

**Table S2. The particle diameter of shrimp muscle protein.**

| Samples                      | Z-Average (d.nm) | PDI   |
|------------------------------|------------------|-------|
| Control (Raw)                | 1 138.0±82.8     | 1.000 |
| Control (Boiled)             | 666.1±78.3       | 0.489 |
| Control (Pressure treated)   | 638.9±81.9       | 0.745 |
| CD sample (Raw)              | 184.5±14.8       | 0.486 |
| CD sample (Boiled)           | 285.3±11.6       | 0.400 |
| CD sample (Pressure treated) | 527.1±20.9       | 0.550 |

**Note:** Control, the sample after cooking and before digestion; DD sample, the sample after continuous simulated gastrointestinal digestion.

Figure S1

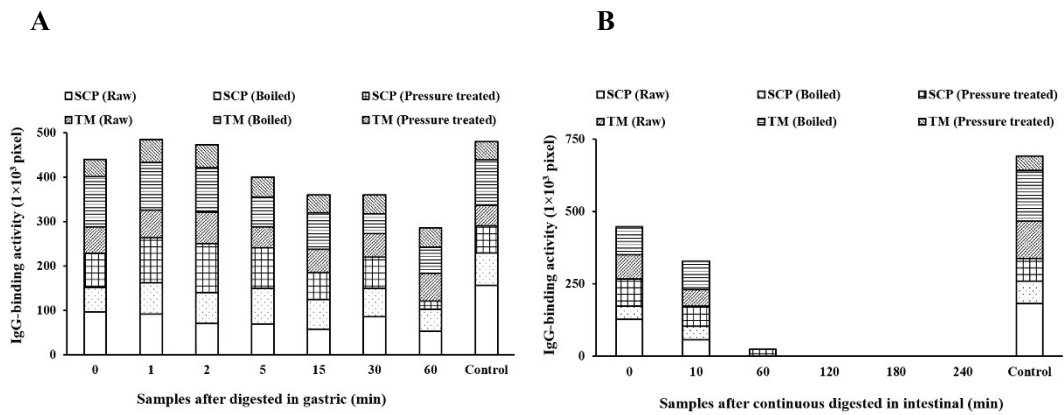

Supplement: c9fo00971j1.pdf [file c9fo00971j1.pdf]
